# Supplementary material
Source: PubMed Central journal article supplement (PMC4704584)
Supplement: supp_pp.15.01336_PP2015-01336R1_Supplemental_Materialtbl4.pdf [file supp_pp.15.01336_PP2015-01336R1_Supplemental_Materialtbl4.pdf]

1 Supplemental Table S4. The 30 PSI genes whose expression is most reduced in *phl2*.

| AGI Code  | Gene Description                               | % of the expression in the WT |
|-----------|------------------------------------------------|-------------------------------|
| AT3G47480 | Calcium-binding EF-hand family protein         | 8.67%                         |
| AT1G60470 | Galactinol synthase 4 (GOLS4)                  | 11.50%                        |
| AT4G39640 | Gamma-glutamyltranspeptidase 1 (GGT1)          | 12.28%                        |
| AT3G54650 | F box-like protein 17(FBL17)                   | 13.64%                        |
| AT5G26920 | Calmodulin-binding protein 60-like G (CBP60G)  | 14.82%                        |
| AT5G66700 | Homeobox protein 53(ATHB53)                    | 14.92%                        |
| AT4G12030 | Bile acid transporter 5 (BAT5)                 | 15.73%                        |
| AT4G26200 | ACC synthase 7 (ACS7)                          | 17.59%                        |
| AT1G22150 | Sulfate transporter 1;3 (SULTR1;3)             | 17.72%                        |
| AT1G32940 | Subtilase family protein (SBT3.5)              | 19.11%                        |
| AT1G13520 | Protein of unknown function (DUF1262)          | 19.68%                        |
| AT5G40780 | Lysine histidine transporter 1 (LHT1)          | 20.44%                        |
| AT1G49900 | C2H2 transcription factor family protein       | 20.46%                        |
| AT3G47540 | Chitinase family protein                       | 20.57%                        |
| AT1G11190 | Bifunctional nuclease I(BFN1)                  | 21.36%                        |
| AT5G48850 | Sulphur deficiency-induced 1 (ATSDI1)          | 21.57%                        |
| AT2G38740 | HAD superfamily protein                        | 21.62%                        |
| AT3G03660 | WUSCHEL related homeobox 11(WOX11)             | 21.91%                        |
| AT4G04890 | Protodermal factor 2 (PDF2)                    | 22.24%                        |
| AT5G06720 | Peroxidase 2                                   | 22.28%                        |
| AT1G13750 | Purple acid phosphatase 1 (PAP1)               | 22.30%                        |
| AT2G32830 | Phosphate transporter 1;5 (Pht1;5)             | 22.32%                        |
| AT1G63750 | Disease resistance protein (TIR-NBS-LRR class) | 22.47%                        |
| AT4G08780 | Peroxidase superfamily protein                 | 22.76%                        |
| AT2G16870 | Disease resistance protein (TIR-NBS-LRR class) | 22.77%                        |
| AT2G30750 | Member of cytochrome P450 (CYP71A12)           | 23.32%                        |
| AT1G68100 | IAA-alanine resistance protein 1 (IAR1)        | 23.42%                        |
| AT5G04120 | Encodes a dPGM-like protein                    | 23.54%                        |
| AT4G37370 | Member of cytochrome P450 (CYP81D8)            | 23.57%                        |
| AT4G20210 | Terpene synthase 8 (TPS08)                     | 23.57%                        |

2  
3  
4  
5  
6  
7
