# Supplementary material
Source: PubMed Central journal article supplement (PMC4704584)
Supplement: supp_pp.15.01336_PP2015-01336R1_Supplemental_Materialtbl7.pdf [file supp_pp.15.01336_PP2015-01336R1_Supplemental_Materialtbl7.pdf]

**Supplemental Table S7. Primer sequences used in this study.**

**Primers used to produce deletion versions of *AtPAP10* promoter (5'-3')**

|                      |                                  |
|----------------------|----------------------------------|
| AtPAP10 FLP F        | TCTAGAGTAGAATTTTCATCTGATTTAGGCTC |
| AtPAP10 $\Delta$ 1 F | TCTAGACTTGGCACTCCACAAAACC        |
| AtPAP10 $\Delta$ 2 F | TCTAGATCATGAGTTAGAGTGCTGTTTTTC   |
| AtPAP10 $\Delta$ 3 F | TCTAGACTGTGCACCACTGATTAGTCTG     |
| AtPAP10 $\Delta$ 4 F | TCTAGAGAGGAAGCATAGATTCGTGTG      |
| AtPAP10 $\Delta$ 5 F | TCTAGACATTTGGCCATTTGGGTC         |
| AtPAP10 $\Delta$ 6 F | TCTAGAGTTGACGACACGGCTCC          |
| AtPAP10 $\Delta$ 7 F | TCTAGACATCAAGCCTCATACATTTCC      |
| AtPAP10 R            | CCCGGGGATCCTTTTG                 |

**Primers used to produce P enhancer versions (5'-3')**

|                                                 |                            |                                                                                                            |
|-------------------------------------------------|----------------------------|------------------------------------------------------------------------------------------------------------|
| For making<br>AtPAP10<br>FLP-LUC                | PZH01-AtPAP10<br>FLP-LUC F | CCAAGCTTGCATGCCTGCAGGTCCCC<br>CCAAGTGAGAACATGTCATGC                                                        |
|                                                 | PZH01-AtPAP10<br>FLP-LUC R | GCGGCCGCTCTAGAAGTGGATCC<br>TTTTGGATTCTGAGATTTTTTTTTTATT<br>C                                               |
| For making<br>AtPAP10<br>P-LUC                  | pZH01-AtPAP10<br>P-LUC F   | CCAAGCTTGCATGCCTGCAGGTCCCC<br>GAGGAAGCATAGATTCGTGTGTC                                                      |
|                                                 | pZH01-AtPAP10<br>P-LUC R   | GCGGCCGCTCTAGAAGTGGATCC<br>CTCGATATGGAATATGTTAACGAACG                                                      |
|                                                 | 35Smini for<br>P-LUC F     | CATATTCCATATCGAGGATCCGCAAGA<br>CCCTTCTCTATATAAGGAAGTTCATT<br>TCATTTGGAGAGGACACGCTGTCTAG<br>AGCGGCCGCCACCGC |
|                                                 | 35Smini for<br>P-LUC R     | GCGGTGGCGGCCGCTCTAGACAGCG<br>TGTCCTCTCAAATGAAATGAACTTCC<br>TTATATAGAGGAAGGGTCTTGCGGATC<br>CTCGATATGGAATATG |
| For making<br>P-UTR-35Sm<br>ini-LUC (no<br>UTR) | pZH01-AtPAP10<br>P-LUC F   | see above                                                                                                  |
|                                                 | P-UTR R (no<br>UTR)        | GGCCGCTCTAGAAGTGGATCCAG<br>AAAAAACCTTATAAGAGAAGAG                                                          |
| For making<br>PS<br>-35Smini-LU<br>C            | pZH01-AtPAP10<br>P-LUC F   | see above                                                                                                  |
|                                                 | PS-overlap R               | GATGTACGTCCGCGGAGTTAATGGAG<br>CCGTGTCGTC                                                                   |
|                                                 | PS-LUC R                   | GCGGCCGCTCTAGAAGTGGATCC<br>AGAAAAACCTTATAAGAGAAGAGAC<br>AGGGGAAATGTATGAGGCTTGATGTA<br>CGTCCGCGGAG          |

7 **Primers used for plant transformation vectors (5'-3')**

|                      |                                                            |
|----------------------|------------------------------------------------------------|
| pZH01-PHL2 gDNA F    | GAACACGGGGGACTCTAGAGGGATCCAATACGT<br>CCAAACTATATCCACCCG    |
| pZH01-PHL2 gDNA R    | GTTTGAACGATCGGGGAAATTCGAGCTCTTCAT<br>CATTTC AATGTTTATTATAG |
| PZH01-PHL3 gDNA F    | GGGGGACTCTAGAGGGATCCTGTCTTGTCCAAT<br>CTATCAACTCG           |
| pZH01-PHL3 gDNA R    | GATCGGGGAAATTCGAGCTCTTATGAGTATTTAA<br>TGAGTATTTTTTATG      |
| pZH01-PHR1 gDNA<br>F | ACGGGGGACTCTAGAGGATCCCCGGGAAGAAG<br>GCGAAGAAAATCATC        |
| pZH01-PHR1 gDNA<br>R | TTGAACGATCGGGGAAATTCGAGCTCAA AACTT<br>TTCAGGTTTGATATTC     |
| PHL2-pJG186-GFP F    | AGAACACGGGGGACGAGCTCATGTACTCAGCG<br>ATTCG                  |
| PHL2-pJG186-GFP R    | TGAGGAGAAGAGCCGGGCCCTCCAATGGTGC<br>TACTAGGC                |
| PHL3-pJG186-GFP F    | AGAACACGGGGGACGAGCTCATGTACTCGG?C<br>GATTCGG                |
| PHL3-pJG186-GFP R    | TGAGGAGAAGAGCCGGGCCCTCCAATGCTAC<br>TACTAGG                 |
| pJG053-GFP-PHL2 F    | ACGCGTCCC GGGGCGGTACCATGTACTCAGCG<br>ATTCGCTCGCTTC         |
| pJG053-GFP-PHL2 R    | TACGAACGAAAGCTCTGCAGTTATCCAATGGTG<br>CTACTAGGC             |
| pJG053-GFP-PHL3 F    | ACGCGTCCC GGGGCGGTACCATGTACTCGGCG<br>ATTCGGTC              |
| pJG053-GFP-PHL3 R    | TACGAACGAAAGCTCTGCAGTCATCCAATGCTA<br>CTACTAGGC             |

8

9 **Primers used for protein expression in *Escherichia coli* (5'-3')**

|                    |                                                                          |
|--------------------|--------------------------------------------------------------------------|
| pMAL-PHL2 F        | AGGATTTACATATGTCCATGGGCGGCCGCATGTA<br>CTCAGCGATTTCGCTCGCTTC              |
| pMAL-PHL2-HIS R    | CCTGCAGGGAATTCGGATCCGTCTGACTCAGTGGT<br>GGTGGTGGTGGTGTTC AATGGTGCTACTAGGC |
| pMAL-PHL3 F        | AGGATTTACATATGTCCATGGGCGGCCGCATGTA<br>CTCGGCGATTTCGG                     |
| pMAL-PHL3-HIS R    | CCTGCAGGGAATTCGGATCCGTCTGACTCAGTGGT<br>GGTGGTGGTGGTGTCCAATGCTACTACTAGG   |
| pMAL-PHR1 F        | AGGATTTACATATGTCCATGGGCGGCCGCATGGA<br>GGCTCGTCCAGTTCAT                   |
| pMAL-PHR1-HIS<br>R | GCAGGGAATTCGGATCCGTCTGACTCAGTGGTGGT<br>GGTGGTGGTGATTATCGATTTTGGGACGC     |

10

11 **Sequence of oligonucleotides for EMSA probes (5'-3')**

|                 |                                                                                            |
|-----------------|--------------------------------------------------------------------------------------------|
| P probe F       | GAGGAAGCATAGATTCGTGTGTCCTCTGGACCAGATAATT<br>AAAAATAAATATCCAACCGTTTCGTTAACATATCCATATCGA     |
| P probe R       | TCGATATGGAATATGTTAACGAACGGTTGGATATTTATTTTT<br>AATTATCTGGTCCAGAGGACACACGAATCTATGCTTCCTC     |
| Probe 1 F       | GAGGAAGCATAGATTCGTGTGTCCTCTGGACCAGATAATT<br>AGAGGAAGCATAGATTCGTGTGTCCTCTGGACCAGATAAT<br>TA |
| Probe 1 R       | TAATTATCTGGTCCAGAGGACACACGAATCTATGCTTCCTC<br>TAATTATCTGGTCCAGAGGACACACGAATCTATGCTTCCTC     |
| Probe 2 F       | CCTCTGGACCAGATAATTAAAAATAAATATCCAACCGTTCC<br>CTCTGGACCAGATAATTAAAAATAAATATCCAACCGTTC       |
| Probe 2 R       | GAACGGTTGGATATTTATTTTAATTATCTGGTCCAGAGGG<br>AACGGTTGGATATTTATTTTAATTATCTGGTCCAGAGG         |
| Probe 3 F       | AAAAATAAATATCCAACCGTTTCGTTAACATATCCATATCGAA<br>AAATAAATATCCAACCGTTTCGTTAACATATCCATATCGA    |
| Probe 3 R       | TCGATATGGAATATGTTAACGAACGGTTGGATATTTATTTTT<br>CGATATGGAATATGTTAACGAACGGTTGGATATTTATTTTT    |
| Probe a F       | GAGGAAGCATAGATTCGTGTGTGAGGAAGCATAGATTCGT<br>GTGT                                           |
| Probe a R       | ACACACGAATCTATGCTTCCTCACACACGAATCTATGCTTC<br>CTC                                           |
| Probe b F       | CCTCTGGACCAGATAATTACCTCTGGACCAGATAATTA                                                     |
| Probe b R       | TAATTATCTGGTCCAGAGGTAATTATCTGGTCCAGAGG                                                     |
| Probe c F       | AAAAATAAATATCCAACCGTTCAAATAAATATCCAACCGTTC                                                 |
| Probe c R       | GAACGGTTGGATATTTATTTGAACGGTTGGATATTTATTTT                                                  |
| Probe d F       | GTTAACATATCCATATCGAGTTAACATATCCATATCGA                                                     |
| Probe d R       | TCGATATGGAATATGTTAACTCGATATGGAATATGTTAAC                                                   |
| P1BS<br>probe F | ATTAACGAATATCCGTACAATTAACGAATATCCGTACA                                                     |
| P1BS<br>probe R | TGTACGGAATATTCGTTAATTGTACGGAATATTCGTTAAT                                                   |

12

13 **Primers used in T-DNA identification (5'-3')**

|               |                          |
|---------------|--------------------------|
| PHL2 T-DNA FP | CCGGTGGACAACCTGAGCTTC    |
| PHL2 T-DNA RP | GAGACCCTTCACTCCCATTTGTTT |
| PHL3 T-DNA FP | TTGTTTTTGTCTTGAGCCAGG    |
| PHL3 T-DNA RP | GTGCATTTACGCAAATGTGTG    |
| LBb1.3        | ATTTTGCCGATTTCCGGAAC     |

14

15

16

17

18 **Primers for qRT-PCR (5'-3')**

|                       |                             |
|-----------------------|-----------------------------|
| P sequence F for ChIP | AAGACAACAAAAGAGGAAGCATAGATT |
| P sequence R for ChIP | GGAATATGTTAACGAACGGTTGGA    |
| 3'UTR F for ChIP      | GAATCTATGAGGAATAGGATTTGTTG  |
| 3'UTR R for ChIP      | TGGCACAAGAACTCTCAAACAAT     |
| AtPAP10 FP qPCR       | TCCTGTTGATGATTCTCCTTCTTG    |
| AtPAP10 RP qPCR       | ATTCATTTATTTGGATGGTTGTTCA   |
| Actin2 FP qPCR        | GACCTTGCTGGACGTGACCTTAC     |
| Actin2 RP qPCR        | TAGTCAACAGCAACAAAGGAGAGC    |
| PHL2 FP qPCR          | CGGTGGACAACACTGAGCTTCAT     |
| PHL2 RP qPCR          | GTTTTGGGAGTCGCTTTGTCA       |
| SPX1 FP qPCR          | CCGTCGGAATATCGAAAGAA        |
| SPX1 RP qPCR          | TCCTTGACAAGCTTGAACAATAAG    |
| SPX2 FP qPCR          | GAAGAGCACTGTGTGCGGCATT      |
| SPX2 RP qPCR          | GTGGCAACGAGAAGACGCTAA       |
| At4 FP qPCR           | TGGCCCCAACACAAGAG           |
| At4 RP qPCR           | CGAACATTCACAATCATAATCTCC    |
| IPS1 FP qPCR          | AGACTGCAGAAGGCTGATTCAGA     |
| IPS1 RP qPCR          | TTGCCCAATTTCTAGAGGGAGA      |
| ACP5 FP qPCR          | CTTAAGTCCTATTGCAGGCTAGGT    |
| ACP5 RP qPCR          | TTGCTAAAAATGATAGGGATGCT     |
| AtPT2 FP qPCR         | CGAAGCTCCTCGGTCGTAT         |
| AtPT2 RP qPCR         | GGAGAGTCCCAGGCTTTTGT        |
| Ph1;5 FP qPCR         | CAGCAGCAACCTCTTCCAAAA       |
| Ph1;5 RP qPCR         | CGTGGATTGCGTTCATTGTT        |
| SULTR1;3 FP qPCR      | TCGCGGCGATCTTATTGC          |
| SULTR1;3 RP qPCR      | GACTCGCGAGCTTTGCATATC       |

19

20
